# Supplementary material for: Fodinicola acaciae sp. nov., an Endophytic Actinomycete Isolated from the Roots of Acacia mangium Willd. and Its Genome Analysis
Source: PubMed Central journal article supplement (PMC7232338; doi:10.3390/microorganisms8040467), 2020-03-25
Supplement: microorganisms-08-00467-s001.pdf [file microorganisms-08-00467-s001.pdf]

***Fodinicola acaciae* sp. nov., an endophytic actinomycete isolated from the roots of *Acacia mangium* Willd. and its genome analysis**

**Huyền Thị Thanh Phạm<sup>1,2</sup>, Wipawadee Suwannapan<sup>1</sup>, Wilaiwan Koomsiri<sup>1,2</sup>, Yuki Inahashi,<sup>3</sup> Akira Také,<sup>4</sup> Atsuko Matsumoto,<sup>3</sup> Arinthip Thamchaipenet<sup>1,2\*</sup>**

<sup>1</sup>Department of Genetics, Faculty of Science, Kasetsart University, Chatuchak, Bangkok 10900, Thailand

<sup>2</sup>Omics Center for Agriculture, Bioresources, Food and Health, Kasetsart University (OmiKU), Bangkok 10900, Thailand

<sup>3</sup>Kitasato Institute for Life Sciences, Kitasato University, 5-9-1 Shirokane, Minato-ku, Tokyo 108-8641, Japan

<sup>4</sup>Department of Microbiology, Kitasato University School of Medicine, 1-5-1 Kitasato, Minami-ku, Sagamihara, Kanagawa 252-0374, Japan

\*Author for correspondence:

Arinthip Thamchaipenet

Tel: +66-2-562-5444 ext. 646703; Fax: +66-2-579-5528; E-mail: arinthip.t@ku.ac.th

**Table S1.** Cultural characteristics of strain GKU 173<sup>T</sup> and *Fodinicola feengrottensis* HKI 0501<sup>T</sup> at 28 °C for 21 days

| Media             | Characteristics    | GKU 173 <sup>T</sup>             | HKI 0501 <sup>T</sup>  |
|-------------------|--------------------|----------------------------------|------------------------|
| ISP 2             | Growth             | Abundant                         | Poor                   |
|                   | Aerial mycelium    | Greyish red, white               | Orange                 |
|                   | Substrate mycelium | Wrinkled, brownish red           | Orange                 |
|                   | Soluble pigment    | Deep red                         | None                   |
| ISP 3             | Growth             | Abundant                         | Good                   |
|                   | Aerial mycelium    | White                            | White, pale orange     |
|                   | Substrate mycelium | Pastel red                       | Wrinkled, orange       |
|                   | Soluble pigment    | Greyish red                      | None                   |
| ISP 4             | Growth             | Abundant, flat                   | Moderate               |
|                   | Aerial mycelium    | White                            | Pale orange            |
|                   | Substrate mycelium | Light orange                     | Wrinkled, pale orange  |
|                   | Soluble pigment    | None (clear zone)                | None                   |
| ISP 5             | Growth             | Abundant, flat                   | Poor                   |
|                   | Aerial mycelium    | White                            | Sparse white, orange   |
|                   | Substrate mycelium | Pale orange to pastel red        | Pale orange            |
|                   | Soluble pigment    | None                             | none                   |
| ISP 6             | Growth             | Good                             | Moderate               |
|                   | Aerial mycelium    | Creamy, pale orange              | Creamy, light yellow   |
|                   | Substrate mycelium | Wrinkled, pale orange            | Wrinkled, light orange |
|                   | Soluble pigment    | None                             | None                   |
| ISP 7             | Growth             | Abundant, flat                   | Poor                   |
|                   | Aerial mycelium    | White                            | Orange                 |
|                   | Substrate mycelium | Light orange to pale orange      | Pale orange            |
|                   | Soluble pigment    | None                             | None                   |
| Bennett's agar    | Growth             | Abundant                         | Abundant               |
|                   | Aerial mycelium    | White with brownish gray spots   | Pale orange            |
|                   | Substrate mycelium | Wrinkled, deep red               | Wrinkled, pale orange  |
|                   | Soluble pigment    | Deep red                         | None                   |
| Organic medium 79 | Growth             | Abundant                         | Good                   |
|                   | Aerial mycelium    | Short white, pastel red          | Pale orange, creamy    |
|                   | Substrate mycelium | Wrinkled, orange-red to high red | Wrinkled, pale orange  |
|                   | Soluble pigment    | High red                         | None                   |
| MS                | Growth             | Abundant                         | Abundant               |
|                   | Aerial mycelium    | White                            | Pale orange            |
|                   | Substrate mycelium | Violet Brown                     | Pale orange            |
|                   | Soluble pigment    | Violet Brown                     | None                   |

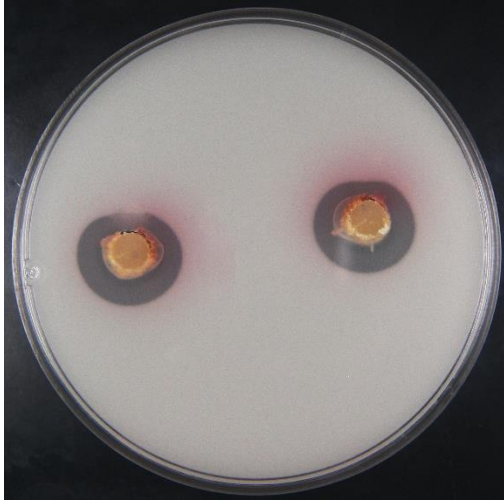

(a)

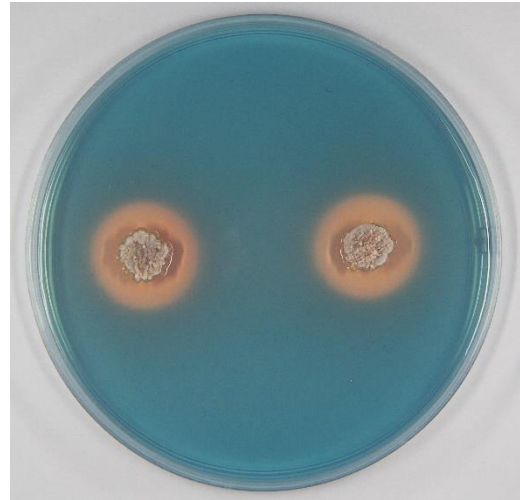

(b)

**Figure S1.** PGP-traits of strain GKU 173<sup>T</sup>. (a) Phosphate solubilization on Pikowskaya's agar supplemented with 2 % tricalcium phosphate. (b) Siderophore production on CAS agar.

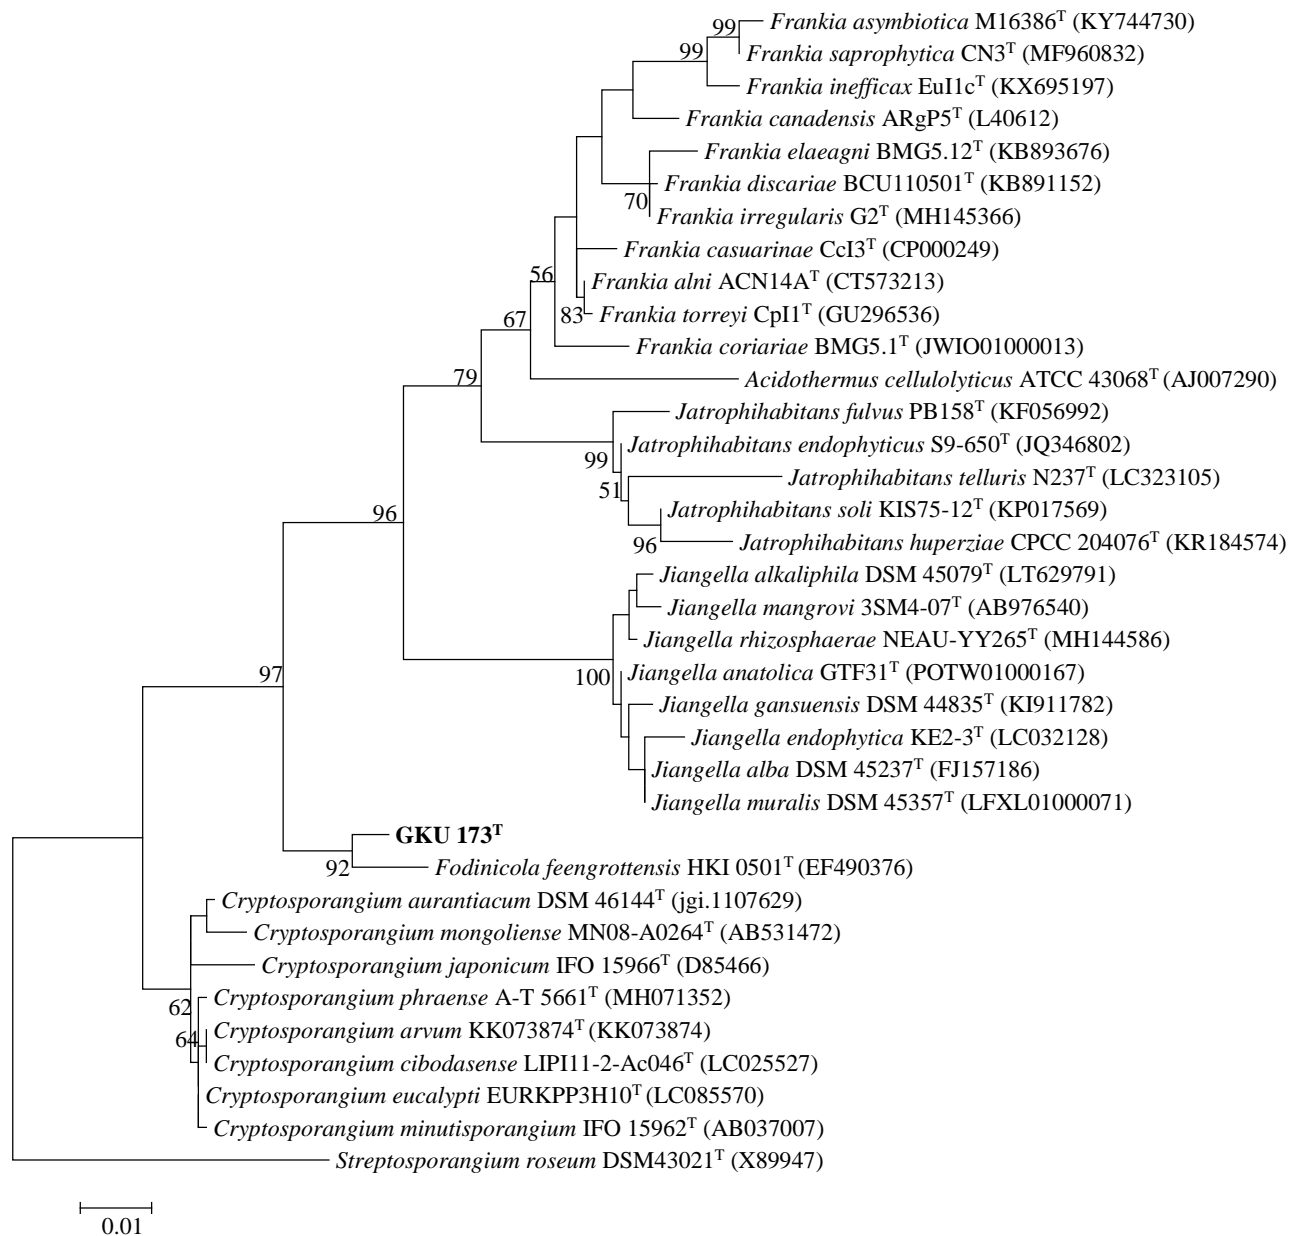

**Figure S2.** Maximum-likelihood phylogenetic tree on the basis of 16S rRNA gene sequences of strain GKU 173<sup>T</sup> and related species. *Streptosporangium roseum* DSM43021<sup>T</sup> was used as an outgroup. Numbers at nodes refer to bootstrap values (based on 1000 replicates; only values >50 % are shown). Bar, 0.01 nucleotide substitutions per site.

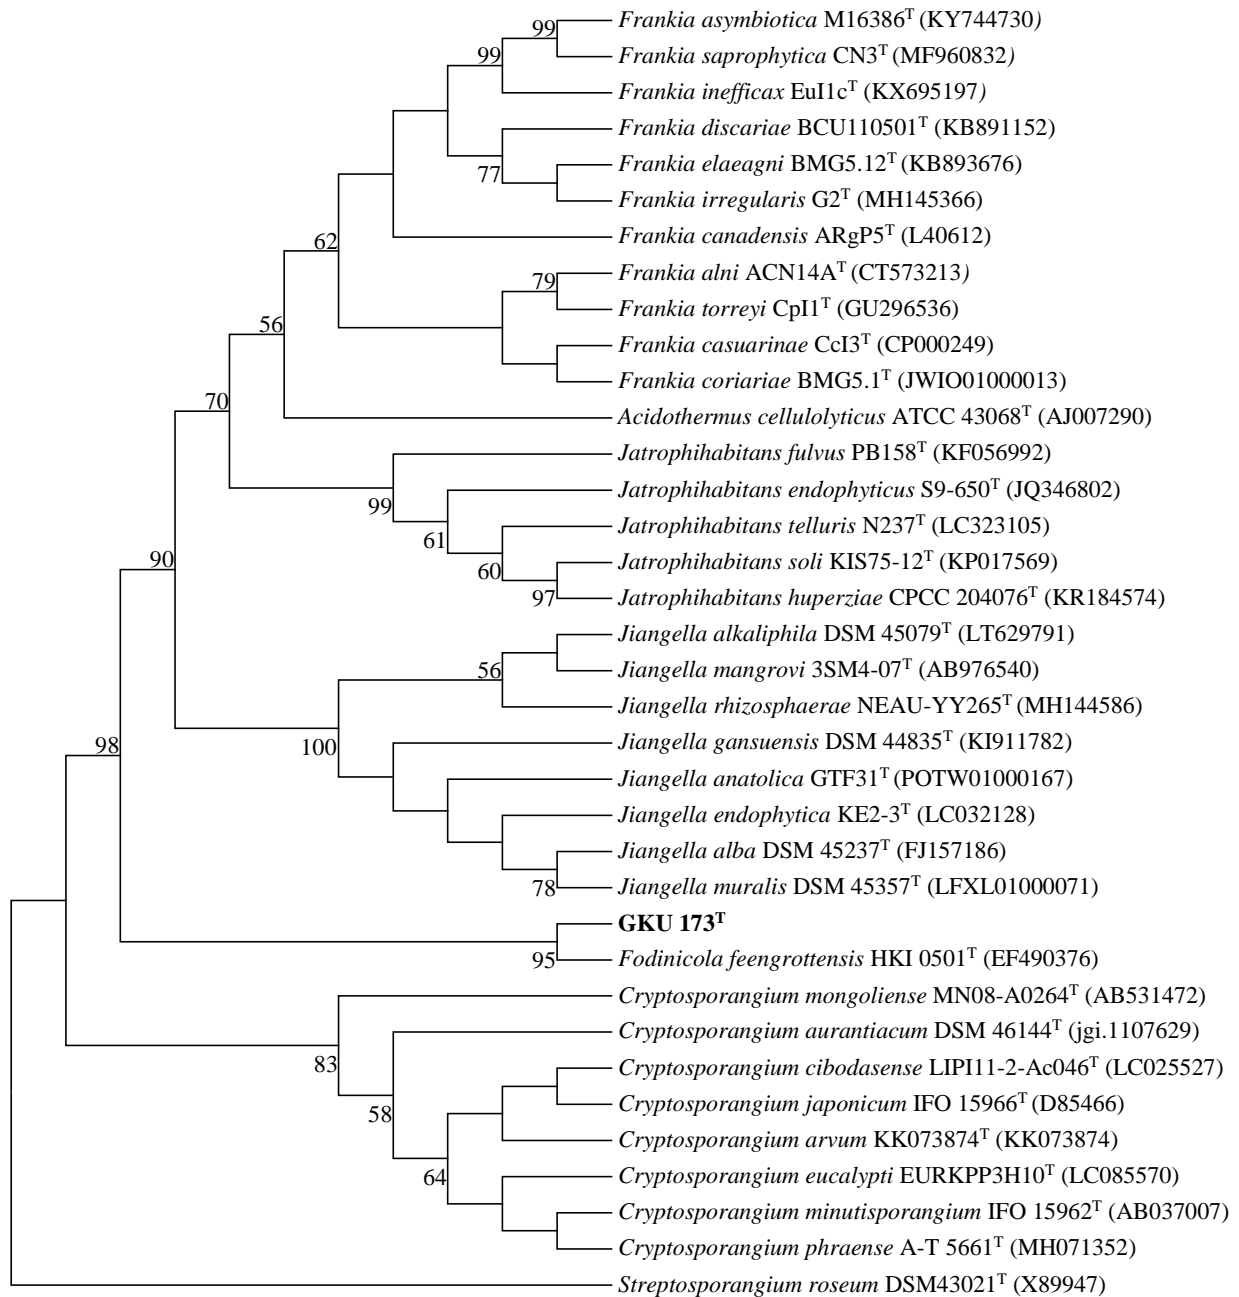

**Figure S3.** Maximum-parsimony phylogenetic tree on the basis of 16S rRNA gene sequences of strain GKU 173<sup>T</sup> and related species. *Streptosporangium roseum* DSM43021<sup>T</sup> was used as an outgroup. Numbers at nodes refer to bootstrap values (based on 1000 replicates; only values >50 % are shown).

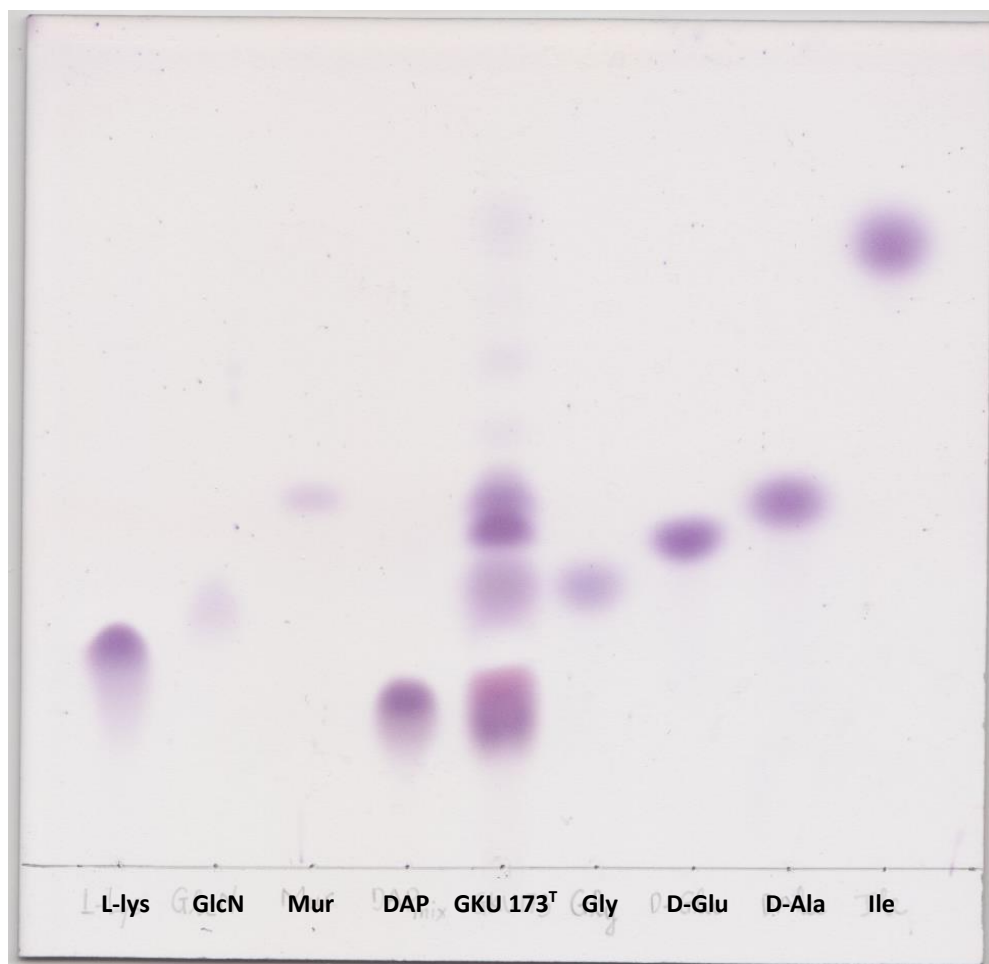

**Figure S4.** Analysis of the cell wall peptidoglycan by one dimensional TLC on cellulose plate.

Abbreviation: D-ala, D-alanine, DAP, diaminopimelic acid, GlcN, glucosamine, D-glu, D-glutamic acid, Gly, glycine, Ile, isoleucine, L-lys, L-lysine, Mur, muramic acid

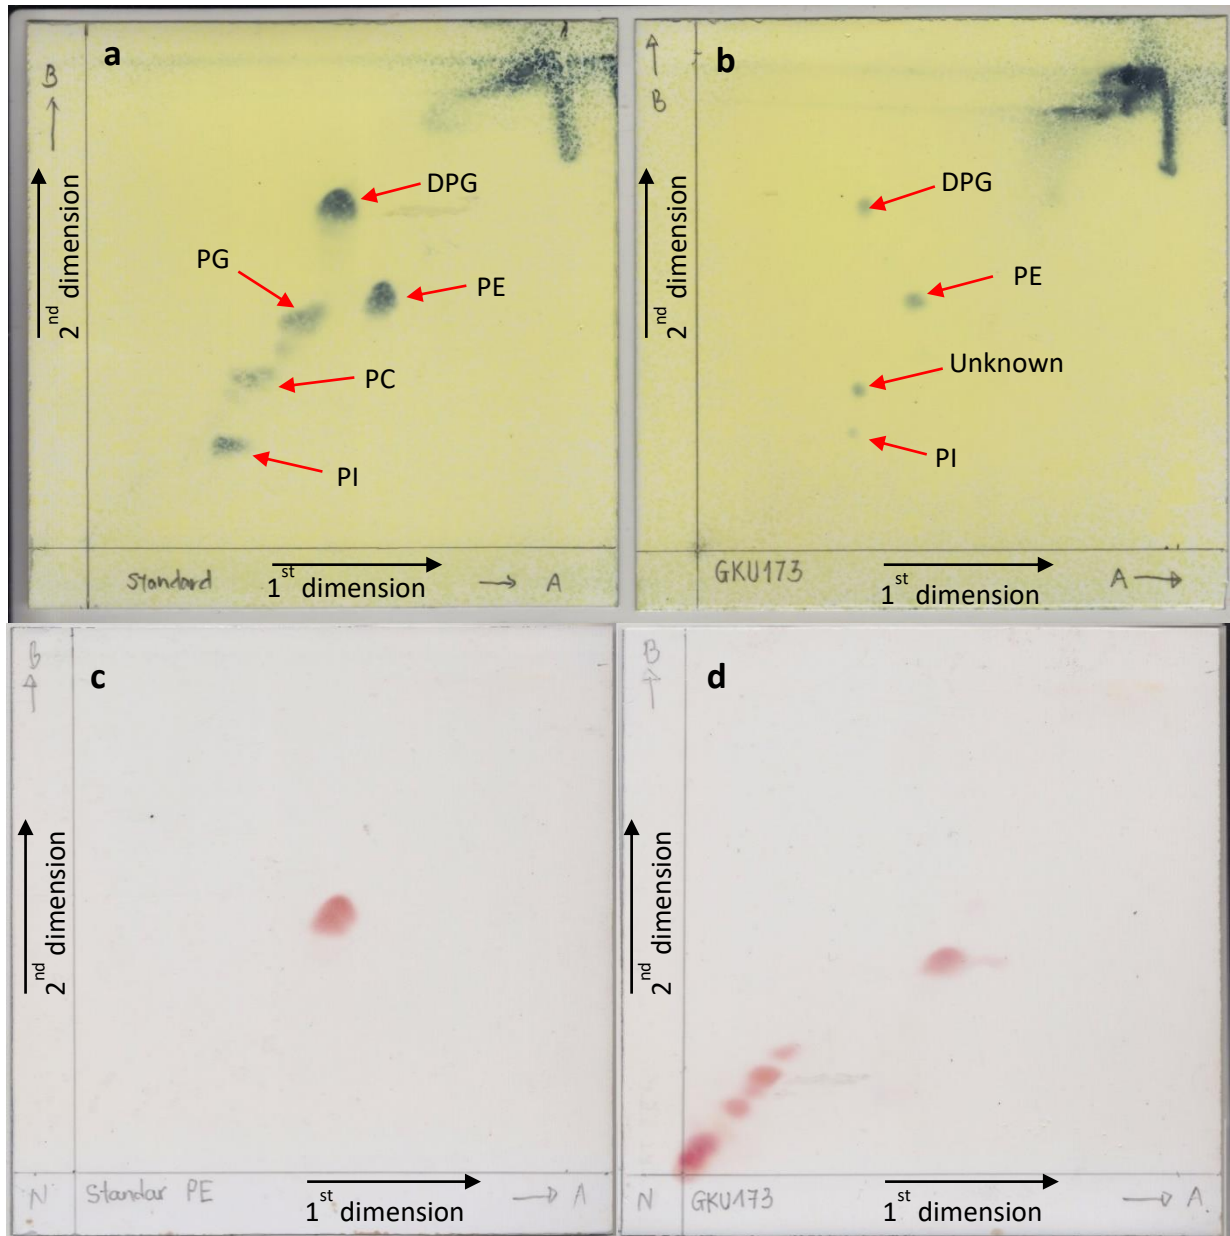

**Figure S5.** Phospholipids analysis separated by two-dimensional TLC. First and second dimension conditions are chloroform:methanol:water (65:25:4) and chloroform:acetic acid:methanol:water (40:7.5:6:2), respectively. (a) Phospholipid standard sprayed with phosphomolybdic acid reagent, (b) phospholipids of strain GKU 173<sup>T</sup> sprayed with phosphomolybdic acid reagent, (c) PE standard sprayed with ninhydrin reagent, (d) phospholipids of strain GKU 173<sup>T</sup> sprayed with ninhydrin reagent. Abbreviation: DPG, diphosphatidylglycerol; PC, phosphatidylcholine; PE, phosphatidylethanolamine; PG, phosphatidylglycerol; PI, phosphatidylinositol

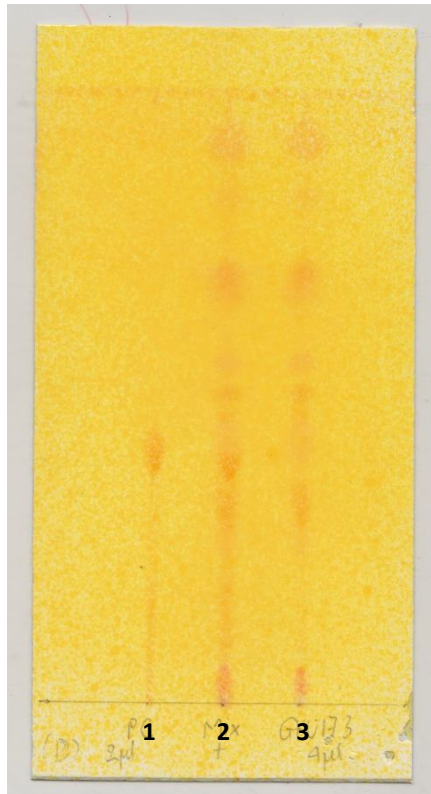

**Figure S6.** Phospholipids analysis separated by one-dimensional TLC and sprayed with dragendorff reagent. Lane 1, phosphatidylcholine (PC) standard; Lane 2, mixture of PC and phospholipids of strain GKU 173<sup>T</sup>; Lane 3, phospholipids of strain GKU 173<sup>T</sup>.
